# Supplementary material
Source: Springer Nature journal article supplement (https://www.springermedizin.de/resource/supplementary/12936_2009_1139_MOESM5_ESM.pdf/9549956)

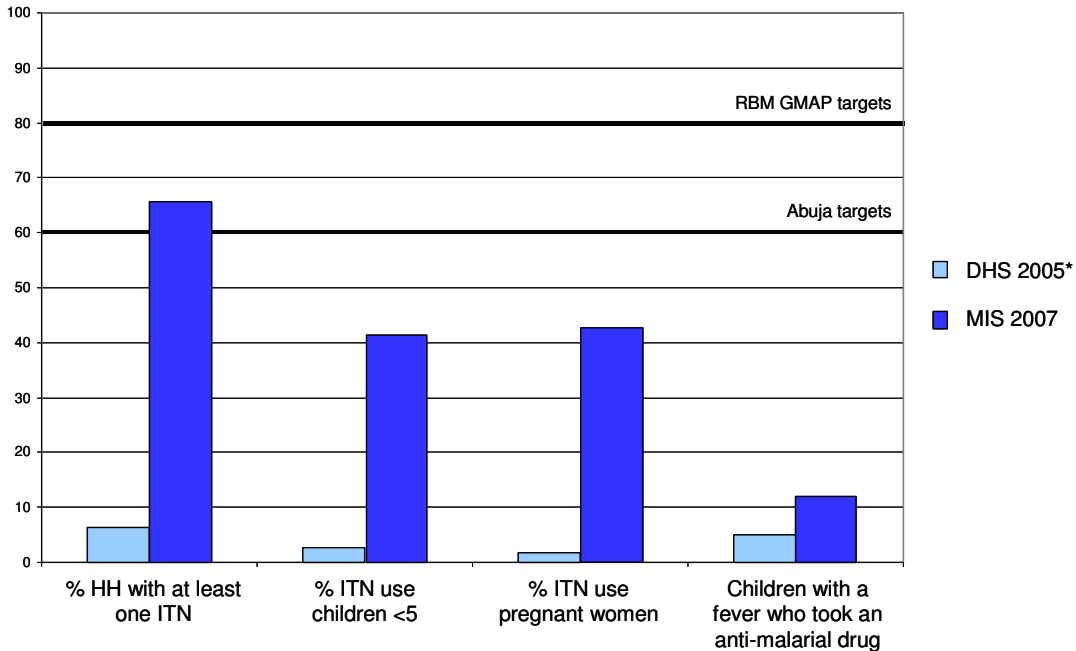

\*Aggregated data for areas below 2000m of altitude

Supplement: MOESM5 [file 9549956]
